# Supplementary material
Source: Springer Nature journal article supplement (https://www.springermedizin.de/resource/supplementary/12969_2008_365_MOESM7_ESM.pdf/9592880)
Supplement: MOESM7 [file 9592880]

SD within child

Right – sided  
Extremity

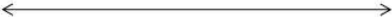

Left – sided  
Extremity

Observer I

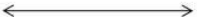

Observer II

SD within joint

Observer I

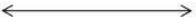

Observer II

SD within joint
